# Supplementary material
Source: MDPI journal article supplement (https://www.mdpi.com/2073-4395/13/12/2994)
Supplement: s1 [file s1]

## Supplementary Material

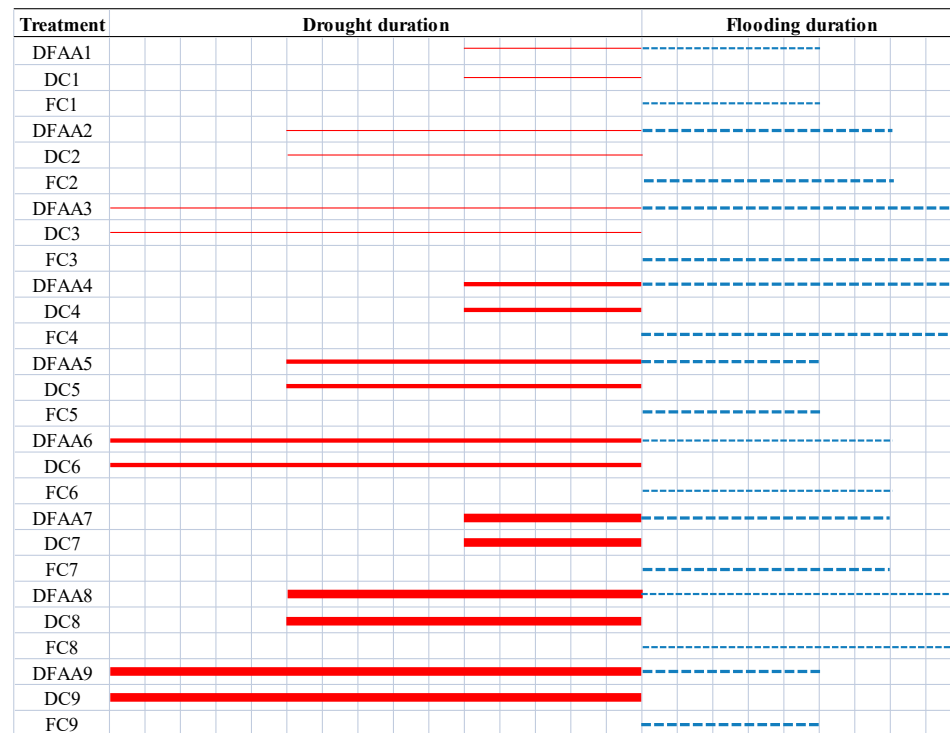

**Figure S1.** Experimental setting. Legend: DFAA, drought–flood abrupt alternation; DC, drought control; FC, flood control. The solid line length indicates the drought duration, and the dashed line length indicates the flood duration. The red line from fine to coarse represents 70%, 60% and 50% of the field water-holding capacity. The blue line from fine to coarse represents a submergence depth of 50%, 75% and 100% of plant height.
